# Supplementary material for: A deterministic, c-di-GMP-dependent program ensures the generation of phenotypically similar, symmetric daughter cells during cytokinesis
Source: Springer Nature journal article supplement (doi:10.1038/s41467-024-50444-4), 2024-07-17
Supplement: 41467_2024_50444_MOESM1_ESM.pdf [file 41467_2024_50444_MOESM1_ESM.pdf]

# Supplementary Information for

## **A deterministic, c-di-GMP-dependent program ensures the generation of phenotypically similar, symmetric daughter cells during cytokinesis**

María Pérez-Burgos, Marco Herfurth, Andreas Kaczmarczyk, Andrea Harms, Katrin Huber, Urs Jenal, Timo Glatter, and Lotte Søgaard-Andersen

### **This file contains:**

- Supplementary Figures 1-6
- Supplementary Table S1-S6
- Supplementary References

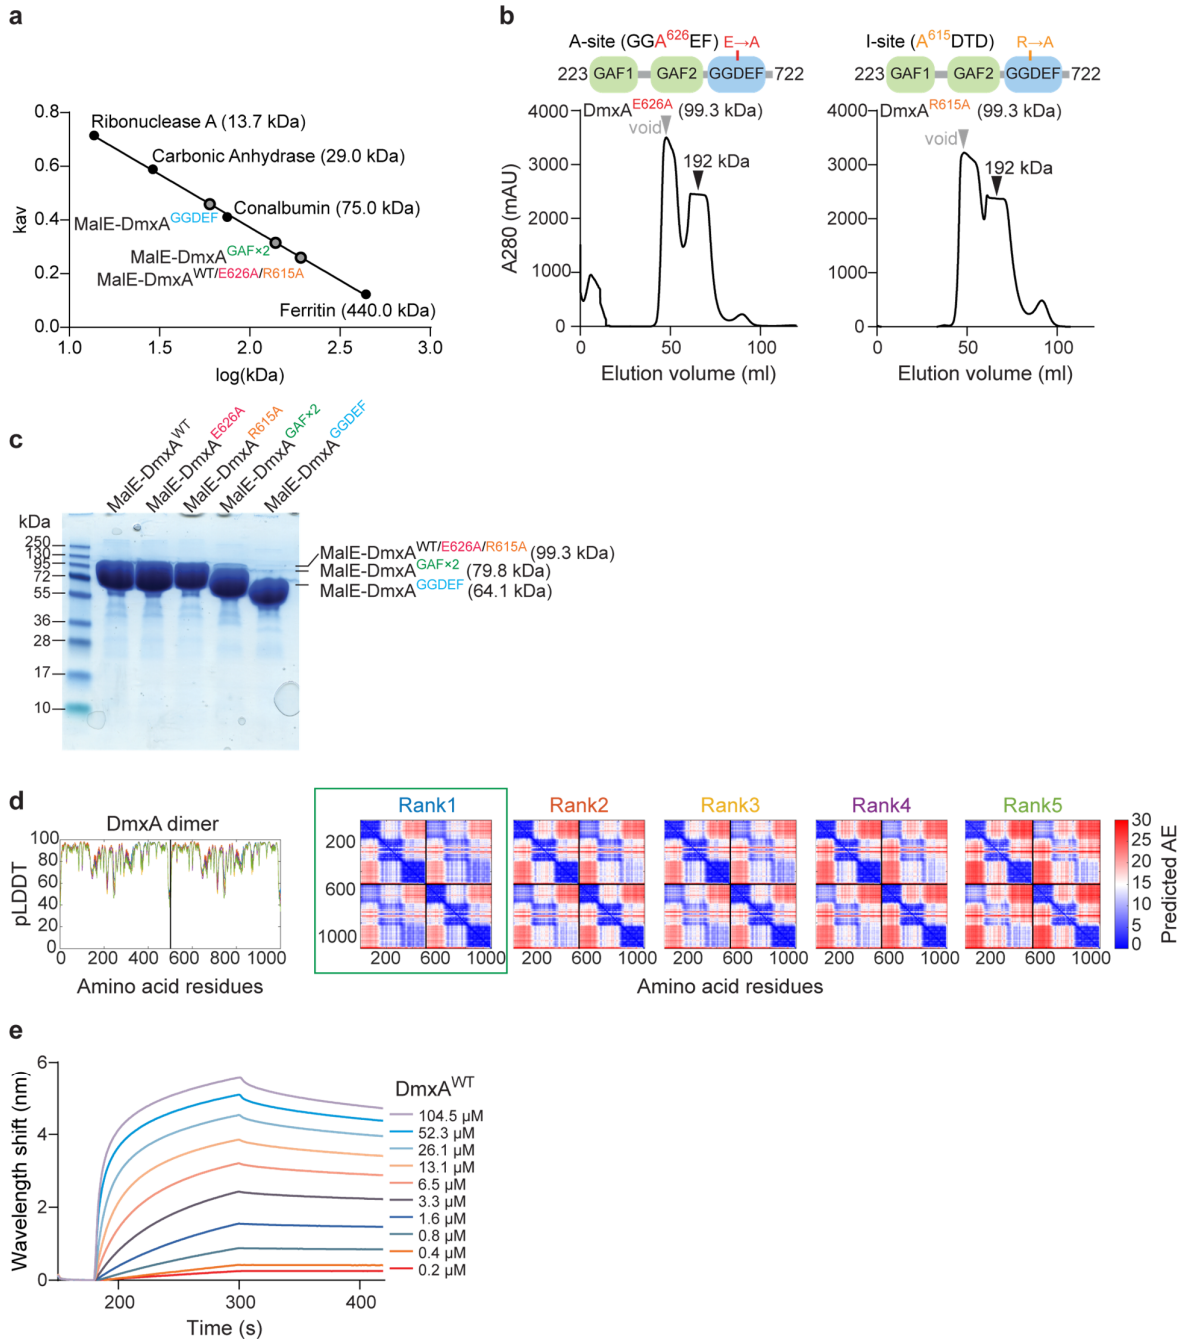

**Figure S1. *In silico* and *in vitro* analysis of DmxA variants.**

**a**, Calibration curve of SEC column. Molecular weight standards including their molecular mass are indicated in black and MalE-DmxA variants in grey dots. **b**, SEC of MalE-DmxA variants. Domain architectures of truncated DmxA variants are shown above chromatograms. Gray arrows indicate the void volume and black arrows the elution volume with the corresponding calculated molecular weight. **c**, Purified MalE-tagged DmxA variants after SEC. The MalE-tagged DmxA variants were separated by SDS-PAGE and stained with Coomassie blue. Calculated molecular weights of proteins are indicated. Molecular size markers are indicated on the left. **d**, pLDDT and pAE plots for five models of the DmxA dimer structure in Fig. 1c predicted by AlphaFold-Multimer. The model marked by a green box was

used for further analysis. **e**, Bio-Layer Interferometric analysis of the binding kinetics of MalE-tagged DmxA<sup>WT</sup> to c-di-GMP. Streptavidin-coated sensors were loaded with 500 nM biotinylated c-di-GMP and probed with indicated concentrations of MalE-DmxA<sup>WT</sup>. The interaction kinetics were followed by monitoring the wavelength shifts during the association or dissociation of the analyte. Source data are provided as a Source Data file.

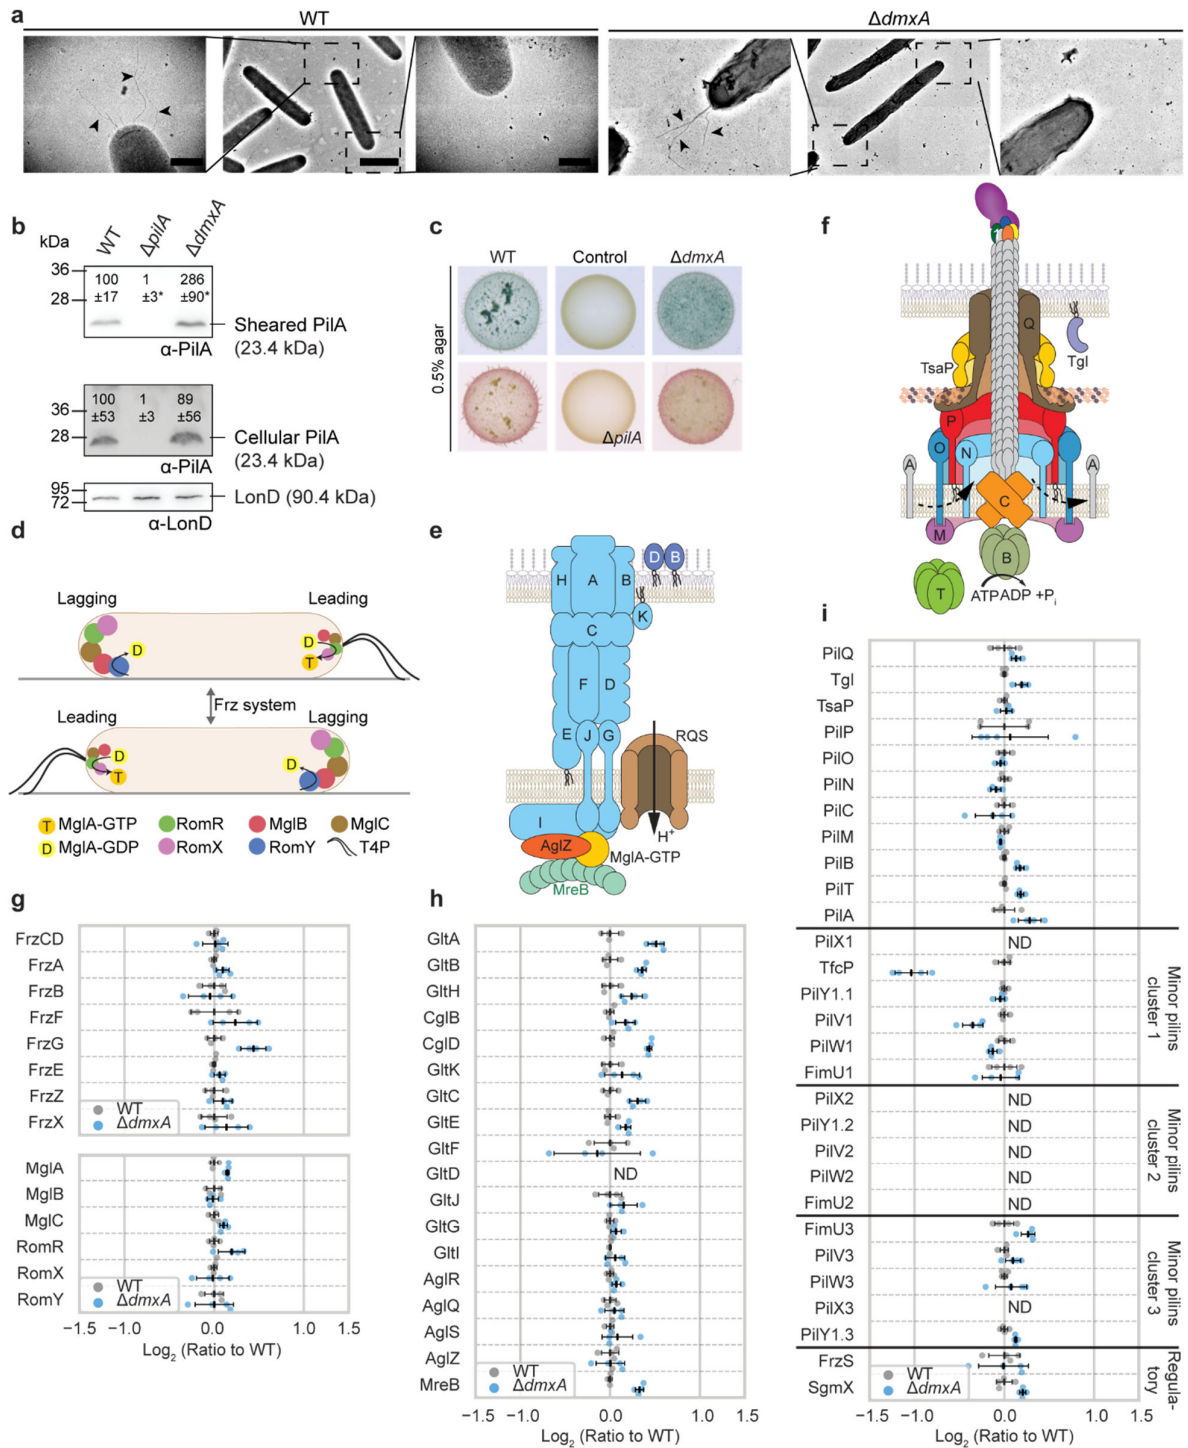

**Figure S2. Phenotypic characterization and proteome analysis of the  $\Delta dmxA$  mutant.**

**a**, Transmission electron microscopy of representative WT and a  $\Delta dmxA$  cells with T4P at one pole. T4P are indicated by black arrowheads. The image in the middle shows the complete cell and the images on the left and right show the two poles. Scale bars, 0.5  $\mu$ m (left and right), 2  $\mu$ m (middle). **b**, T4P shear-off assay. Immunoblot detection of PilA in sheared T4P (top) and in total cell extract (bottom). Protein was isolated from the same number of cells from the indicated strains grown on 1% CTT 1.5% agar plates. Protein from the same number of cells was loaded per lane. The blot for cellular PilA was stripped and

then probed with  $\alpha$ -LonD as a loading control. Calculated molecular weights of proteins are indicated. Numbers indicate the average level of PilA from n=3 biological replicates normalized to the loading control and relative to WT (100%). \*  $p=0.0006$  for  $\Delta pilA$  vs WT;  $p=0.0245$  for  $\Delta dmxA$  vs WT, two-sided Student's  $t$ -test compared to WT. **c**, Determination of EPS synthesis. Cell suspensions of strains of the indicated genotypes were spotted on 0.5% agar supplemented with 0.5% CTT and Congo red or Trypan blue and incubated for 24 h. The  $\Delta pilA$  mutant does not accumulate EPS<sup>1</sup> and was used as negative control. **d-f** Localization of the proteins of the polarity module (d) as well as schematics of the gliding motility complex (e) and the T4PM (f). In **d**, proteins of the polarity module are indicated<sup>2-10</sup>. Upon signaling by the Frz chemosensory system, their polarity is inverted. For each protein, the size of a circle indicates the amount of polarly localized protein. In **e**, proteins labeled with single letters in light blue, dark blue or brown have the Glt, Cgl or Agl prefix, respectively<sup>11-18</sup>. The AglR/-Q/-S complex harnesses proton-motive force to power gliding motility<sup>19, 20</sup>. In **f**, proteins labeled with single letters have the Pil prefix. The pilus fiber is formed by PilA subunits and a tip complex, composed of PilY1 and four minor pilins (blue: PilX, orange: PilV, green: PilW, yellow: FimU)<sup>21, 22</sup>. Tgl is an OM lipoprotein that is required for PilQ secretin assembly<sup>23-25</sup>. The ATPases PilB and PilT interact with the base of the T4PM in a mutually exclusive manner to stimulate extension and retraction of the pilus, respectively<sup>21, 26, 27</sup>. Bent arrows indicate incorporation of and removal of PilA subunits from the pilus base during extension and retraction, respectively. In **e** and **f**, lipoproteins are indicated by wavy black lines. **g-i**, Log<sub>2</sub> fold-change of the accumulation of proteins of the Frz chemosensory system and the polarity module (g), the Glt/Agl complex (h), and the T4PM (i) in the  $\Delta dmxA$  strain compared to WT. ND, not detected. Data points represent n=4 biological replicates. Error bars, mean $\pm$ SD based on these four replicates. Source data are provided as a Source Data file.

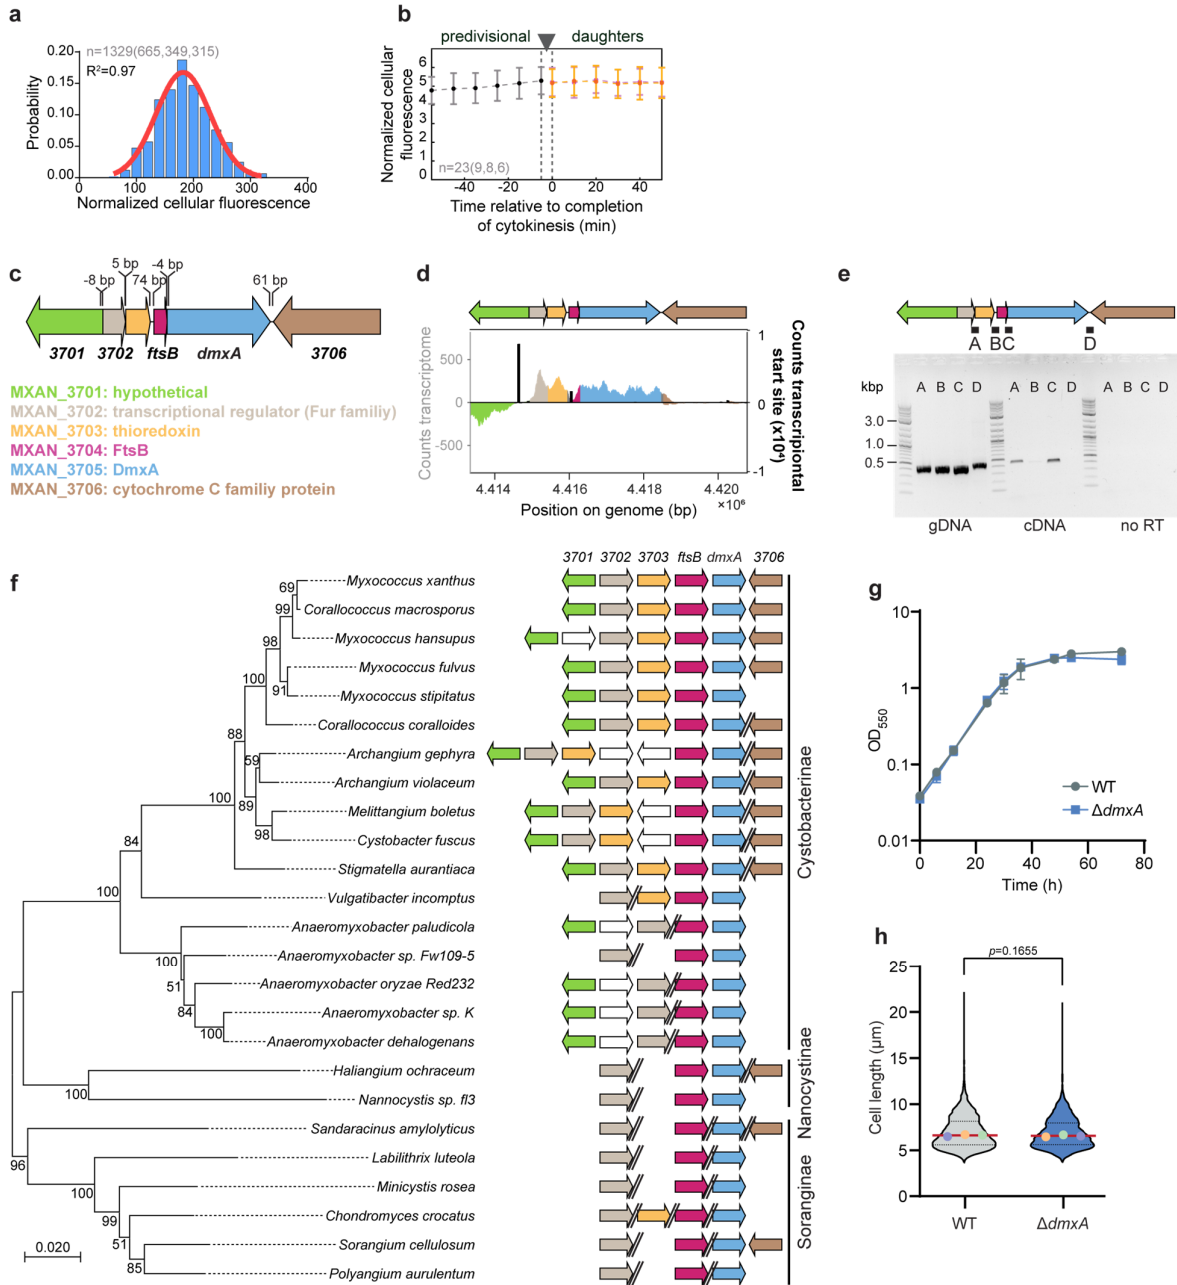

**Figure S3. Analysis of DmxA-mVenus accumulation and the *dmxA* locus.**

**a**, Distribution of the normalized cellular DmxA-mVenus fluorescence in single cells (n=1329 from three biological replicates, number of cells per replicate in brackets). Single cell total cellular fluorescence was normalized by the cell area to obtain the normalized cellular fluorescence. The distribution of the normalized cellular fluorescence is shown in histogram and was fitted to a Gaussian curve indicating a good fit to a unimodal distribution. **b**, Quantification of normalized cellular DmxA-mVenus fluorescence in time-lapse microscopy (n=23 division events from three biological replicates, number of events per replicate in brackets). DmxA-mVenus signals were determined before division in the predivisional cell (grey) and after division in the daughter cells (pink and yellow) at the indicated time points. Error bars, mean $\pm$ SD. **c**, *dmxA* locus. Genes are drawn to scale and MXAN numbers or gene names are indicated. Predicted protein function is indicated. **d**, RNA-seq and

Cappable-seq as base-by-base alignment coverage for total RNA isolated from cells growing in 1% CTT broth<sup>28</sup>. Upper panel, genetic organization of *dmxA* locus as in **c**. Lower panel, positive and negative values indicate reads mapped to the forward and reverse strand, respectively. Reads assigned to a gene are colored according to the gene colour code in **c**; intergenic regions are in gray. Cappable-seq coverage is shown as black bars. **e**, Operon mapping of the *dmxA* locus. Upper panel, genetic organization of *dmxA* locus as in **c**. Letters and black lines below the genes indicate the fragments amplified by PCR (~400-500 bp). Bottom panel, the PCR products amplified using genomic DNA, cDNA, and an enzyme-free reverse transcription reaction (no RT) as templates were separated on a 1% agarose gel. Letters above the individual lanes correspond to the letters of the primer combinations depicted above. Molecular size markers in kilo base-pairs (kbp) are shown on the left. Representative image from n=2 biological replicates. **f**, Conservation of *dmxA* and its genetic neighborhood in other Myxococcales. Species included are listed in Table S6. Double slashes indicate no close proximity between the genes. **g**, Growth curve. Exponentially growing cells were diluted to an optical density (OD) at 550 nm (OD<sub>550</sub>) of 0.04 and growth was followed over time. Growth curves were generated from n=3 biological replicates. Error bars, mean±SD. **h**, Cell length determination. The cell length distribution of three biological replicates is shown in a violin plot. Each violin indicates the probability density of the data at different cell length values. Single points represent the median of the three biological replicates indicated in different colours (n=4956 from three biological replicates with each 1652 cells). Median is represented by a continuous red line. Dashed lines indicate 25<sup>th</sup> and 75<sup>th</sup> percentiles. Samples were compared using a two-sided Mann-Whitney test. Source data are provided as a Source Data file.

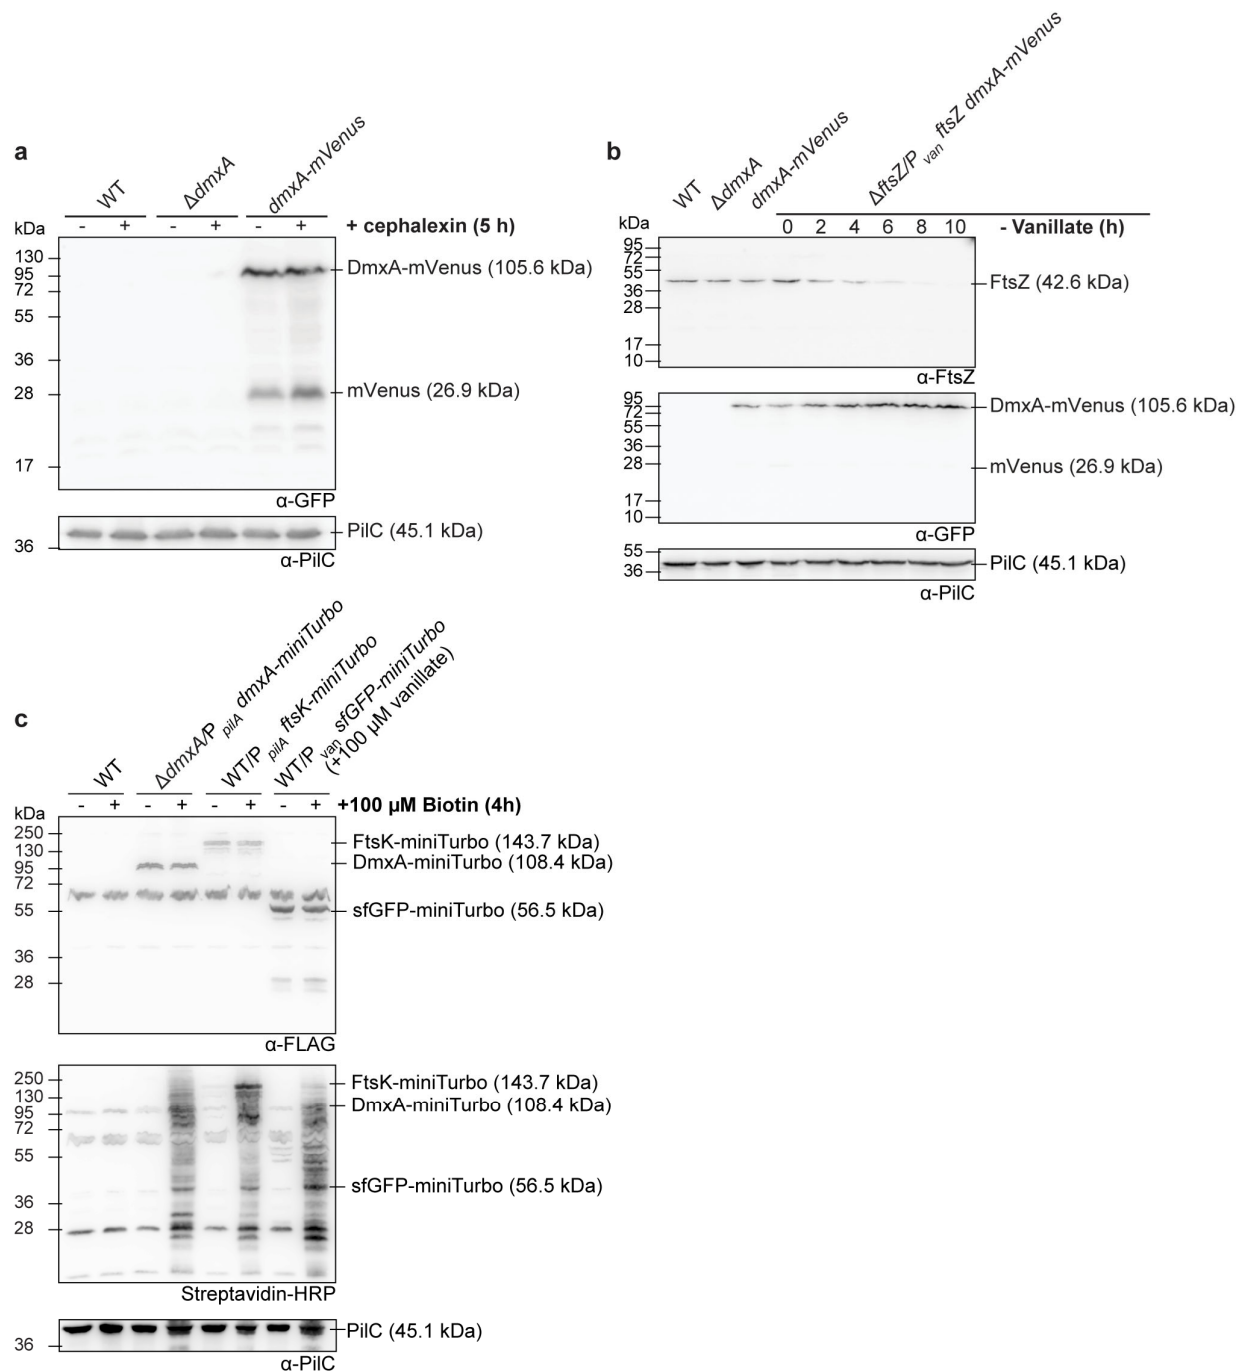

**Figure S4. Accumulation of DmxA-mVenus, FtsZ and miniTurbo variants.**

**a**, Immunoblot detection of DmxA-mVenus. Protein from  $5.60 \times 10^8$  cells from exponentially growing suspension cultures treated with cephalixin for 5 h as indicated was loaded per lane. The same blot was stripped before applying a new antibody. PiIC served as a loading control. Calculated molecular weights of proteins are indicated. **b**, Immunoblot detection of FtsZ and DmxA-mVenus. Protein from  $1.05 \times 10^8$  cells from exponentially growing suspension cultures was loaded per lane. For the depletion of FtsZ, cells were exponentially grown in suspension culture in the presence of 10  $\mu$ M vanillate for  $\sim 8$  generations before the start of the experiment. Then, cells were washed and subsequently grown for 10 h without vanillate. The same blot was stripped before applying a new antibody. PiIC served as a loading



control. Calculated molecular weights of proteins are indicated. **c**, Immunoblot detection of DmxA-, FtsK- and sfGFP-miniTurbo. DmxA-miniTurbo-FLAG and FtsK-miniTurbo-FLAG were expressed from the *pilA* promoter ( $P_{pilA}$ ) and sfGFP-miniTurbo-FLAG from the  $P_{van}$  in the presence of 100  $\mu$ M vanillate. Protein from  $7.00 \times 10^7$  cells from exponentially growing suspension cultures treated with or without biotin for 4 h was loaded per lane. The same blot was stripped before applying a new antibody. PilC served as a loading control. Western blots are representative from n=2 biological replicates. Source data are provided as a Source Data file.

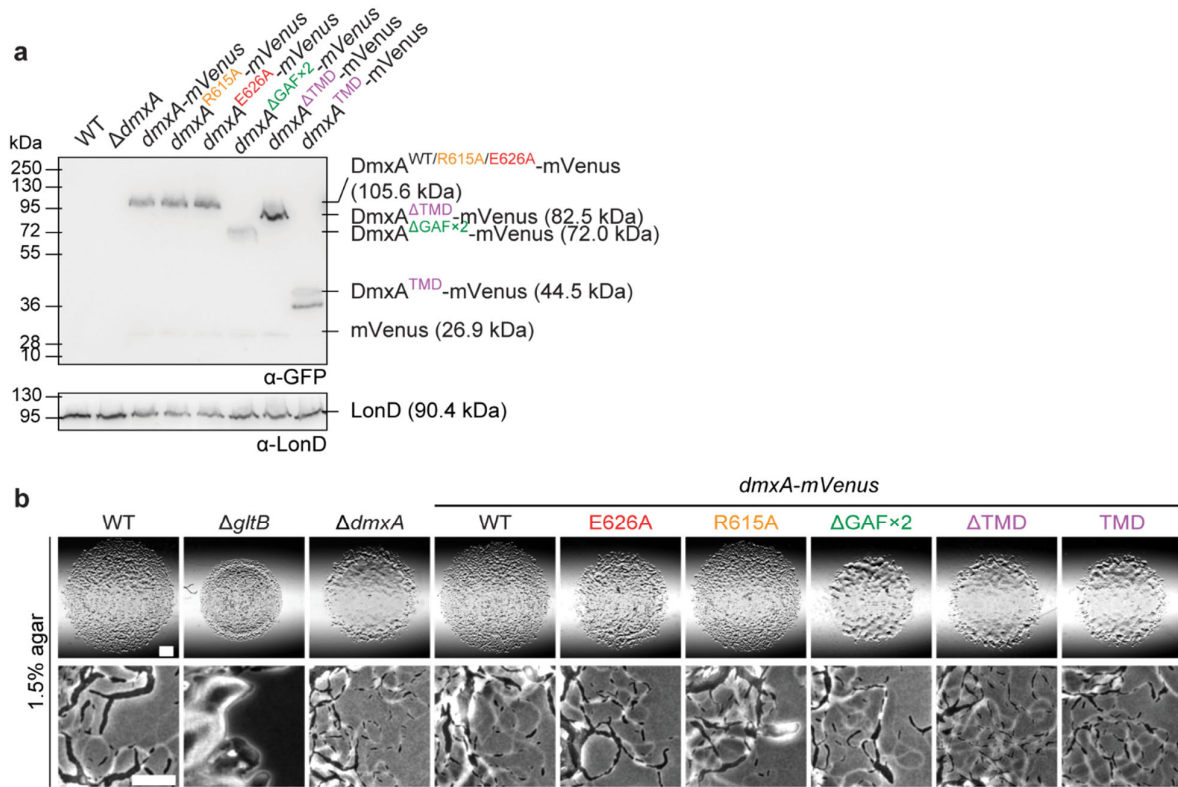

**Figure S5. Accumulation of DmxA-mVenus variants and gliding in their presence.**  
**a**, Immunoblot detection of DmxA-mVenus variants. Protein from  $1.40 \times 10^8$  cells from exponentially growing suspension cultures was loaded per lane. The same blot was stripped before applying a new antibody. LonD served as a loading control. Calculated molecular weights of proteins are indicated. Representative blots from  $n=2$  biological replicates. **b**, Gliding was analyzed on 1.5% agar. Scale bars, 1 mm (upper panels), 50  $\mu\text{m}$  (lower panels). Source data are provided as a Source Data file.

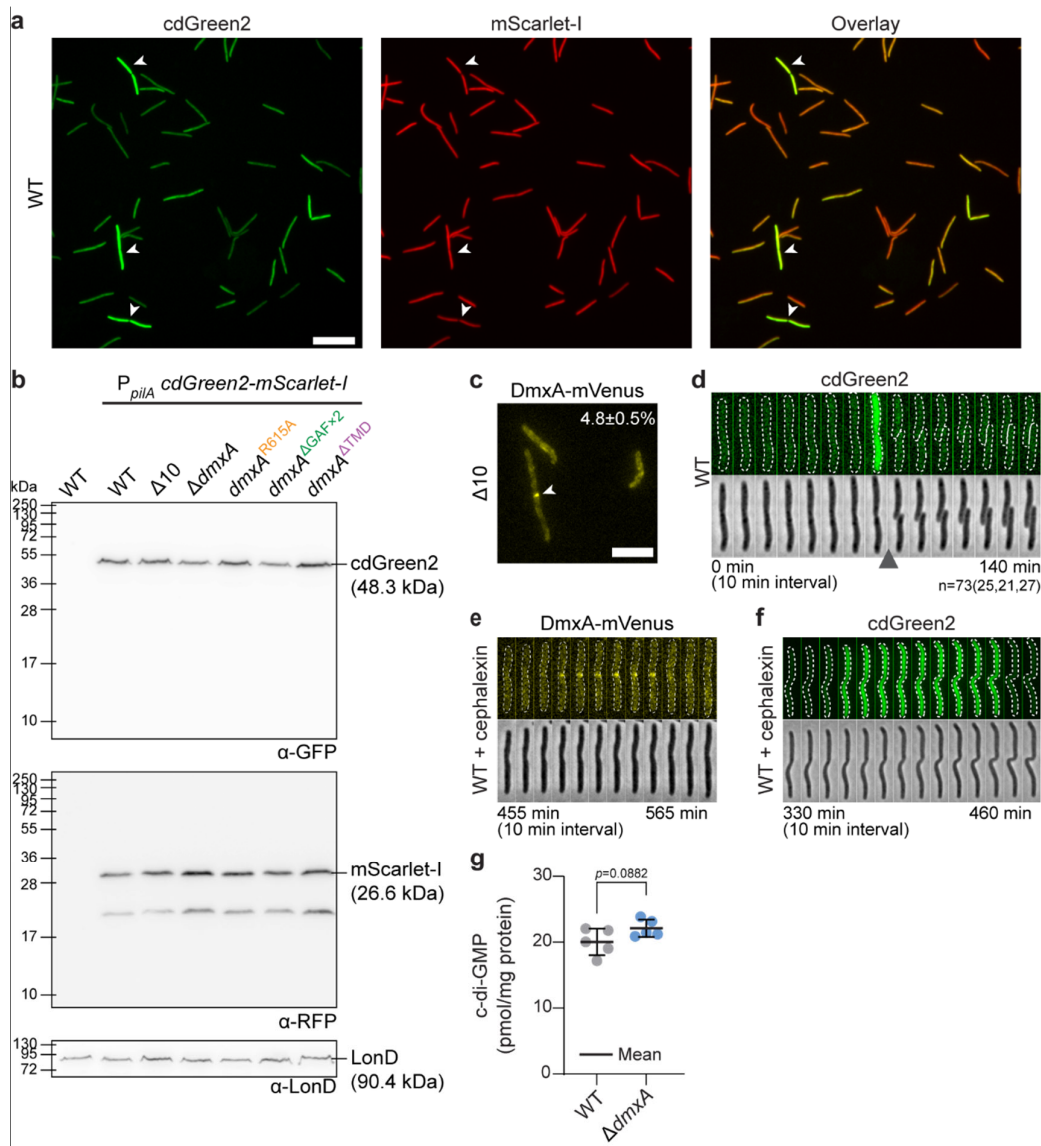

**Figure S6. Accumulation and analysis of cdGreen2 and mScarlet-I fluorescence**  
**a**, Analysis of the cdGreen2 and mScarlet-I fluorescence in WT cells. White arrows indicate cells with bright cdGreen2 fluorescence. Scale bar, 10  $\mu$ m. **b**, Immunoblot detection of cdGreen2 and mScarlet-I. Protein from  $7.00 \times 10^7$  cells from exponentially growing suspension cultures was loaded per lane. The same blot was stripped before applying a new antibody. LonD served as a loading control. Calculated molecular weights of proteins are indicated. Representative blots from  $n=2$  biological replicates. **c**, Localization of the DmxA-mVenus in  $\Delta 10$  cells by epifluorescence microscopy. The mean $\pm$ SD percentage of cells with a cluster at mid-cell ( $n=600$  from three biological replicates with each 200 cells) is indicated. White arrowhead indicate cluster. Scale bar, 5  $\mu$ m. **d**, cdGreen2 fluorescence in WT cells during the cell cycle. Epifluorescence and phase-contrast images from time-lapse microscopy of a representative cell. In every division event, a high cdGreen2 signal was observed ( $n=73$  division events from three biological replicates, number of events per replicate in brackets). Images were recorded every 10 min; arrowhead, completion of cytokinesis. **e-f**, Analysis of representative WT cells expressing DmxA-mVenus (**e**) or cdGreen2 (**f**) treated with cephalalexin. Images were recorded every 5 min (**e**) or every 10 min (**f**). **g**, c-di-GMP level of indicated strains during growth. The level of c-di-GMP is shown as the mean $\pm$ SD from  $n=5$  biological replicates. Individual data points are shown. Samples

were compared using a two-sided Student's  $t$ -test. Source data are provided as a Source Data file.

**Table S1.** Proteins significantly enriched in DmxA-miniTurbo-FLAG proximity labeling experiments

| <b>Locus Tag</b> | <b>Name</b> | <b>Annotation</b>                                                        | <b>log2Ratio*</b> | <b>-log10(p-value)**</b> |
|------------------|-------------|--------------------------------------------------------------------------|-------------------|--------------------------|
| MXAN_3705        | DmxA        | Diguanylate cyclase                                                      | 15.15             | 6.13                     |
| MXAN_5591        |             | FHA domain/tetratricopeptide repeat protein                              | 6.20              | 5.63                     |
| MXAN_4591        | Pkn1        | Serine/threonine-protein kinase                                          | 5.87              | 5.81                     |
| MXAN_5723        |             | MJ0042 family finger-like domain protein                                 | 5.36              | 3.56                     |
| MXAN_0755        | Pkn9        | Serine/threonine protein kinase                                          | 5.28              | 3.25                     |
| MXAN_3955        | Pkn10       | Serine/threonine protein kinase                                          | 5.16              | 5.40                     |
| MXAN_4324        |             | Uncharacterized protein                                                  | 5.03              | 2.13                     |
| MXAN_1436        |             | Hydrolase, alpha/beta fold family                                        | 4.95              | 4.13                     |
| MXAN_1131        |             | Uncharacterized protein                                                  | 4.74              | 3.69                     |
| MXAN_4024        |             | Uncharacterized protein                                                  | 4.64              | 3.48                     |
| MXAN_6266        |             | Putative 2,3-cyclic-nucleotide 2-phosphodiesterase                       | 4.58              | 2.74                     |
| MXAN_4956        |             | Uncharacterized protein                                                  | 4.45              | 5.56                     |
| MXAN_2680        |             | Serine/threonine protein kinase                                          | 4.43              | 4.74                     |
| MXAN_1350        |             | Histidine kinase                                                         | 4.34              | 3.88                     |
| MXAN_5778        | PilS2       | Histidine kinase                                                         | 4.32              | 4.86                     |
| MXAN_5946        |             | Cytochrome c family protein/iron permease, FTR1 family                   | 4.23              | 2.86                     |
| MXAN_4677        |             | Uncharacterized protein                                                  | 4.21              | 2.98                     |
| MXAN_3550        |             | Uncharacterized protein                                                  | 4.18              | 3.96                     |
| MXAN_7417        | EpsY        | OPX polysaccharide export protein                                        | 4.18              | 2.05                     |
| MXAN_4735        |             | Putative membrane protein                                                | 4.16              | 3.20                     |
| MXAN_6605        | CsdK1       | PilZ-domain/DnaK family protein                                          | 4.16              | 4.27                     |
| MXAN_2059        |             | Putative serine/threonine protein kinase                                 | 4.14              | 4.39                     |
| MXAN_1134        |             | Adenylate/guanylate cyclase domain protein                               | 4.12              | 3.31                     |
| MXAN_0117        |             | Serine/threonine protein kinase                                          | 4.05              | 2.13                     |
| MXAN_4700        |             | Serine/threonine protein kinase                                          | 4.00              | 3.67                     |
| MXAN_1622        |             | Uncharacterized protein                                                  | 3.98              | 3.40                     |
| MXAN_5710        |             | Pyrimidine-nucleoside phosphorylase                                      | 3.86              | 2.38                     |
| MXAN_3108        |             | FHA domain/tetratricopeptide repeat protein                              | 3.79              | 2.47                     |
| MXAN_5321        |             | Uncharacterized protein                                                  | 3.65              | 4.04                     |
| MXAN_3106        |             | Protein transporter, outer bacterial membrane secretin (Secretin) family | 3.64              | 4.98                     |
| MXAN_2710        |             | Putative lipoprotein                                                     | 3.59              | 4.85                     |
| MXAN_1460        | FtsK        | Cell division protein                                                    | 3.56              | 2.62                     |
| MXAN_1942        |             | MJ0042 family finger-like domain/tetratricopeptide repeat protein        | 3.46              | 4.37                     |
| MXAN_6420        | Pkn2        | Serine/threonine protein kinase                                          | 3.45              | 2.68                     |
| MXAN_5667        |             | Hydrolase, alpha/beta fold family                                        | 3.44              | 3.96                     |
| MXAN_2520        |             | FHA domain/tetratricopeptide repeat protein                              | 3.39              | 4.06                     |
| MXAN_3343        |             | Histidine kinase                                                         | 3.32              | 3.44                     |
| MXAN_1249        |             | Histidine kinase                                                         | 3.30              | 3.03                     |
| MXAN_3778        | CsdK2       | PilZ-domain/DnaK family protein                                          | 3.27              | 3.17                     |
| MXAN_4730        |             | Lipoprotein releasing system, transmembrane protein, LolC/E family       | 3.25              | 2.87                     |
| MXAN_2683        |             | Methyl accepting chemotaxis protein                                      | 3.23              | 3.02                     |

|           |  |                                                            |      |      |
|-----------|--|------------------------------------------------------------|------|------|
| MXAN_5813 |  | Uncharacterized protein                                    | 3.22 | 4.45 |
| MXAN_6183 |  | Serine/threonine protein kinase                            | 3.14 | 2.97 |
| MXAN_3808 |  | Protease 4                                                 | 3.14 | 2.49 |
| MXAN_3159 |  | Uncharacterized protein                                    | 3.14 | 4.50 |
| MXAN_2504 |  | Putative general secretion pathway protein L               | 3.12 | 4.42 |
| MXAN_3461 |  | Oxidoreductase, short chain dehydrogenase/reductase family | 3.11 | 2.20 |
| MXAN_6720 |  | Putative lipoprotein                                       | 3.08 | 4.70 |
| MXAN_1313 |  | Uncharacterized protein                                    | 3.04 | 3.11 |
| MXAN_0745 |  | Uncharacterized protein                                    | 3.03 | 4.34 |

\* Fold change between the average intensities of the DmxA-miniTurbo-FLAG and the sfGFP-miniTurbo-FLAG samples.

\*\*  $\log_{10}$  of  $p$ -value: Calculated using eBayes moderated  $t$ -statistics<sup>29</sup>.

**Table S2.** Proteins significantly enriched in FtsK-miniTurbo-FLAG proximity labeling experiments

| Locus Tag | Name  | Annotation                                                               | log2Ratio* | -log10(p-value)** |
|-----------|-------|--------------------------------------------------------------------------|------------|-------------------|
| MXAN_1460 | FtsK  | Cell division protein                                                    | 10.85      | 6.07              |
| MXAN_5723 |       | MJ0042 family finger-like domain protein                                 | 6.34       | 3.87              |
| MXAN_5591 |       | FHA domain/tetratricopeptide repeat protein                              | 6.17       | 6.27              |
| MXAN_2297 |       | Uncharacterized protein                                                  | 5.95       | 3.90              |
| MXAN_0960 |       | Putative serine/threonine protein kinase                                 | 5.82       | 2.07              |
| MXAN_4359 | FtsH  | ATP-dependent zinc metalloprotease                                       | 5.79       | 3.96              |
| MXAN_3108 |       | FHA domain/tetratricopeptide repeat protein                              | 5.66       | 4.81              |
| MXAN_4700 |       | Serine/threonine protein kinase                                          | 5.65       | 4.83              |
| MXAN_2438 |       | Type III secretion apparatus protein, YscI/HrpB family                   | 5.34       | 2.94              |
| MXAN_2710 |       | Putative lipoprotein                                                     | 5.34       | 5.51              |
| MXAN_3705 | DmxA  | Diguanylate cyclase                                                      | 5.25       | 3.34              |
| MXAN_1527 |       | NAD dependent epimerase/dehydratase family protein                       | 5.22       | 5.24              |
| MXAN_2077 |       | Protein kinase domain protein                                            | 5.07       | 3.79              |
| MXAN_4037 |       | Cytidylate kinase                                                        | 4.98       | 3.80              |
| MXAN_3106 |       | Protein transporter, outer bacterial membrane secretin (Secretin) family | 4.90       | 5.09              |
| MXAN_0363 | TfcP  | T4P motility protein                                                     | 4.80       | 5.48              |
| MXAN_6605 | CsdK1 | PilZ-domain/DnaK family protein                                          | 4.78       | 4.31              |
| MXAN_6860 | AglS  | Gliding motility protein                                                 | 4.78       | 2.82              |
| MXAN_1419 |       | Uncharacterized protein                                                  | 4.77       | 3.92              |
| MXAN_4186 |       | Uncharacterized protein                                                  | 4.71       | 3.46              |
| MXAN_5765 |       | Putative general secretion pathway protein A                             | 4.69       | 4.47              |
| MXAN_6224 |       | DNA-binding response regulator, Fis family                               | 4.68       | 4.14              |
| MXAN_5772 | PilQ  | T4P secretin                                                             | 4.66       | 3.77              |
| MXAN_5028 |       | Putative membrane protein                                                | 4.59       | 4.64              |
| MXAN_3001 | TsaP  | T4P motility protein                                                     | 4.58       | 6.12              |
| MXAN_0755 | Pkn9  | Serine/threonine protein kinase                                          | 4.57       | 2.84              |
| MXAN_4024 |       | Uncharacterized protein                                                  | 4.51       | 3.17              |
| MXAN_5075 |       | Ribose-phosphate pyrophosphokinase                                       | 4.49       | 3.01              |
| MXAN_5319 | PglC  | Tetratricopeptide repeat protein                                         | 4.43       | 5.96              |
| MXAN_6705 | PilT5 | T4P retraction ATPase                                                    | 4.41       | 4.04              |
| MXAN_3013 |       | ATP-dependent protease ATPase subunit HslU                               | 4.37       | 5.57              |
| MXAN_4667 |       | General secretion pathway protein E, N-terminal domain protein           | 4.32       | 4.10              |
| MXAN_6183 |       | Serine/threonine protein kinase                                          | 4.29       | 3.94              |
| MXAN_6861 | AglQ  | Gliding motility protein                                                 | 4.26       | 3.75              |
| MXAN_4737 |       | HDIG domain protein                                                      | 4.17       | 3.51              |
| MXAN_2968 |       | Efflux transporter, RND family, MFP subunit                              | 4.12       | 5.30              |
| MXAN_6420 | Pkn2  | Serine/threonine protein kinase                                          | 4.11       | 4.07              |
| MXAN_3202 | Pkn3  | Serine/threonine protein kinase                                          | 4.05       | 5.55              |
| MXAN_1361 |       | FHA domain protein                                                       | 4.04       | 2.87              |

|           |      |                                                            |      |      |
|-----------|------|------------------------------------------------------------|------|------|
| MXAN_2312 |      | Uncharacterized protein                                    | 4.04 | 3.42 |
| MXAN_1350 |      | Histidine kinase                                           | 4.02 | 5.82 |
| MXAN_0459 |      | Histidine kinase                                           | 3.98 | 4.29 |
| MXAN_3337 |      | NAD-dependent protein deacylase                            | 3.95 | 3.38 |
| MXAN_5597 | FtsZ | Cell division protein                                      | 3.93 | 3.86 |
| MXAN_3550 |      | Uncharacterized protein                                    | 3.91 | 5.69 |
| MXAN_2483 |      | Type II DNA topoisomerase, B subunit                       | 3.91 | 4.74 |
| MXAN_7208 |      | Serine/threonine protein kinase                            | 3.90 | 4.99 |
| MXAN_2480 |      | Signal peptide peptidase SppA, 36K type                    | 3.89 | 3.75 |
| MXAN_2550 | Pkn6 | Serine/threonine protein kinase                            | 3.85 | 2.98 |
| MXAN_3710 |      | Serine/threonine protein kinase                            | 3.83 | 2.02 |
| MXAN_5152 |      | OmpA family protein                                        | 3.83 | 5.40 |
| MXAN_5735 | FtsY | Signal recognition particle receptor                       | 3.79 | 5.32 |
| MXAN_2680 |      | Serine/threonine protein kinase                            | 3.79 | 4.07 |
| MXAN_1178 |      | FKBP-type peptidyl-prolyl isomerase, trigger factor family | 3.78 | 2.91 |
| MXAN_5783 | PilA | T4P major pilin                                            | 3.77 | 5.24 |
| MXAN_7025 |      | DnaK family protein                                        | 3.76 | 3.88 |
| MXAN_4371 |      | Serine/threonine protein kinase                            | 3.73 | 3.44 |
| MXAN_2586 |      | Serine/threonine protein kinase                            | 3.72 | 5.00 |
| MXAN_0625 |      | Aldehyde dehydrogenase                                     | 3.69 | 2.37 |
| MXAN_1948 |      | TPR domain protein                                         | 3.65 | 5.25 |
| MXAN_5786 | PilC | T4P motility protein                                       | 3.57 | 3.67 |
| MXAN_7371 |      | Serine/threonine protein kinase                            | 3.54 | 3.43 |
| MXAN_5129 |      | Uncharacterized protein                                    | 3.52 | 4.58 |
| MXAN_4094 |      | Uncharacterized protein                                    | 3.48 | 3.27 |
| MXAN_0018 |      | Serine/threonine protein kinase                            | 3.48 | 3.78 |
| MXAN_6704 |      | Acetyltransferase, GNAT family                             | 3.40 | 3.37 |
| MXAN_0882 |      | Serine/threonine protein kinase                            | 3.37 | 3.68 |
| MXAN_3570 |      | Uncharacterized protein                                    | 3.37 | 4.62 |
| MXAN_4735 |      | Putative membrane protein                                  | 3.36 | 4.36 |
| MXAN_1984 |      | Uncharacterized protein                                    | 3.34 | 4.76 |
| MXAN_0653 |      | Peptidase, S8A (Subtilisin) subfamily                      | 3.33 | 3.38 |
| MXAN_6310 |      | AhpC/TSA family protein                                    | 3.33 | 2.08 |
| MXAN_2444 |      | Uncharacterized protein                                    | 3.27 | 2.86 |
| MXAN_1995 | PilT | T4P retraction ATPase                                      | 3.27 | 3.01 |
| MXAN_2512 | GspF | General secretion pathway protein F                        | 3.25 | 3.15 |
| MXAN_6570 |      | Serine/threonine protein kinase                            | 3.22 | 2.82 |
| MXAN_0344 |      | Metallophosphoesterase                                     | 3.16 | 3.89 |
| MXAN_6155 |      | Alkylphosphonate utilization operon protein PhnA           | 3.13 | 5.22 |
| MXAN_0871 |      | Putative serine/threonine protein kinase                   | 3.13 | 2.30 |
| MXAN_5696 |      | Serine/threonine protein kinase                            | 3.13 | 3.87 |
| MXAN_4591 | Pkn1 | Serine/threonine protein kinase                            | 3.12 | 3.72 |
| MXAN_6189 |      | Uncharacterized protein                                    | 3.12 | 3.63 |
| MXAN_4867 | GlhF | Gliding motility protein                                   | 3.12 | 4.51 |



|           |  |                                   |      |      |
|-----------|--|-----------------------------------|------|------|
| MXAN_6611 |  | Uncharacterized protein           | 3.11 | 3.34 |
| MXAN_2013 |  | Trigger factor                    | 3.06 | 5.01 |
| MXAN_0599 |  | Uncharacterized protein           | 3.06 | 2.33 |
| MXAN_5824 |  | Putative membrane protein         | 3.06 | 3.67 |
| MXAN_3984 |  | SPFH/band 7 domain protein        | 3.04 | 2.40 |
| MXAN_3918 |  | Glutamate synthase, small subunit | 3.04 | 3.80 |
| MXAN_6751 |  | Uncharacterized protein           | 3.03 | 4.12 |
| MXAN_2156 |  | Serine/threonine protein kinase   | 3.03 | 3.98 |

\* Fold change between the average intensities of the FtsK-miniTurbo-FLAG and the sfGFP-miniTurbo-FLAG samples.

\*\* Log<sub>10</sub> of *p*-value: Calculated using eBayes moderated *t*-statistics<sup>29</sup>.

**Table S3.** Strains used in this work

| Strain                   | Genotype                                                                                                                                                                                                                                                                                                           | Reference  |
|--------------------------|--------------------------------------------------------------------------------------------------------------------------------------------------------------------------------------------------------------------------------------------------------------------------------------------------------------------|------------|
| <b><i>M. xanthus</i></b> |                                                                                                                                                                                                                                                                                                                    |            |
| DK1622                   | Wildtype                                                                                                                                                                                                                                                                                                           | 30         |
| DK10410                  | $\Delta pilA$                                                                                                                                                                                                                                                                                                      | 31         |
| SA3922                   | $\Delta gltB$                                                                                                                                                                                                                                                                                                      | 11         |
| SA8802                   | $\Delta frzE$                                                                                                                                                                                                                                                                                                      | 6          |
| SA3387                   | $\Delta mglB$                                                                                                                                                                                                                                                                                                      | 4          |
| SA7442                   | $\Delta dmxA$                                                                                                                                                                                                                                                                                                      | This study |
| SA7447                   | $\Delta dmxA attB::pTP140$ ( $P_{nat} dmxA$ )                                                                                                                                                                                                                                                                      | This study |
| SA7466                   | $\Delta dmxA \Delta pilA$                                                                                                                                                                                                                                                                                          | This study |
| SA12010                  | $\Delta dmxA \Delta gltB$                                                                                                                                                                                                                                                                                          | This study |
| SA7479                   | $\Delta dmxA \Delta frzE$                                                                                                                                                                                                                                                                                          | This study |
| SA7485                   | $dmxA-mVenus$                                                                                                                                                                                                                                                                                                      | This study |
| SA8589                   | $dmxA-mVenus \Delta gltB$                                                                                                                                                                                                                                                                                          | This study |
| SA8580                   | $dmxA^{E626A}-mVenus$                                                                                                                                                                                                                                                                                              | This study |
| SA7488                   | $dmxA^{R615A}-mVenus$                                                                                                                                                                                                                                                                                              | This study |
| SA12015                  | $dmxA^{\Delta GAF \times 2 (\Delta 223-532)}-mVenus$                                                                                                                                                                                                                                                               | This study |
| SA12034                  | $dmxA^{\Delta TMD (\Delta 3-222)}-mVenus$                                                                                                                                                                                                                                                                          | This study |
| SA12065                  | $dmxA^{TMD (1-167)}-mVenus$                                                                                                                                                                                                                                                                                        | This study |
| SA6755                   | $\Delta ftsZ MXAN_{18-19}::pMAT86$ ( $P_{van} ftsZ$ )                                                                                                                                                                                                                                                              | This study |
| SA8511                   | $\Delta ftsZ MXAN_{18-19}::pMAT86$ ( $P_{van} ftsZ$ ) $dmxA-mVenus$                                                                                                                                                                                                                                                | This study |
| SA8596                   | $\Delta dmxA attB::pMP172$ ( $P_{pilA} dmxA-miniTurbo-FLAG$ )                                                                                                                                                                                                                                                      | This study |
| SA12038                  | $attB::pMH110$ ( $P_{pilA} ftsK-miniTurbo-FLAG$ )                                                                                                                                                                                                                                                                  | This study |
| SA12027                  | WT $MXAN_{18-19}::pMH97$ ( $P_{van} sfGFP-miniTurbo-FLAG$ )                                                                                                                                                                                                                                                        | 32         |
| SA9082                   | $attB::pMH123$ ( $P_{pilA} cdGreen2 mScarlet-I$ )                                                                                                                                                                                                                                                                  | This study |
| SA12093                  | $\Delta gltB attB::pMH123$ ( $P_{pilA} cdGreen2 mScarlet-I$ )                                                                                                                                                                                                                                                      | This study |
| SA12091                  | $\Delta dmxA attB::pMH123$ ( $P_{pilA} cdGreen2 mScarlet-I$ )                                                                                                                                                                                                                                                      | This study |
| SA12092                  | $\Delta dmxA \Delta gltB attB::pMH123$ ( $P_{pilA} cdGreen2 mScarlet-I$ )                                                                                                                                                                                                                                          | This study |
| SA5666                   | $\Delta 10$<br>( $\Delta MXAN_{1525}$ , $\Delta MXAN_{4029}$ , $\Delta MXAN_{5199}$ ,<br>$\Delta MXAN_{7362}$ , $\Delta gacB$ ( $\Delta MXAN_{4463}$ ), $\Delta gacA$<br>( $\Delta MXAN_{2643}$ ), $\Delta MXAN_{2997}$ , $\Delta MXAN_{5366}$ , $\Delta dmxB$<br>( $\Delta MXAN_{3735}$ ), $\Delta MXAN_{5791}$ ) | This study |
| SA12098                  | $\Delta 10^* dmxA-mVenus$                                                                                                                                                                                                                                                                                          | This study |
| SA9083                   | $\Delta 10^* attB::pMH123$ ( $P_{pilA} cdGreen2 mScarlet-I$ )                                                                                                                                                                                                                                                      | This study |
| SA12063                  | $\Delta 10^* \Delta gltB$                                                                                                                                                                                                                                                                                          | This study |
| SA9084                   | $\Delta 10^* \Delta gltB attB::pMH123$ ( $P_{pilA} cdGreen2 mScarlet-I$ )                                                                                                                                                                                                                                          | This study |
| SA13309                  | $dmxA^{R615A}$                                                                                                                                                                                                                                                                                                     | This study |
| SA13310                  | $dmxA^{R615A} attB::pMH123$ ( $P_{pilA} cdGreen2 mScarlet-I$ )                                                                                                                                                                                                                                                     | This study |
| SA12023                  | $dmxA^{\Delta GAF \times 2 (\Delta 223-532)}$                                                                                                                                                                                                                                                                      | This study |
| SA12097                  | $dmxA^{\Delta GAF \times 2 (\Delta 223-532)} attB::pMH123$ ( $P_{pilA} cdGreen2 mScarlet-I$ )                                                                                                                                                                                                                      | This study |
| SA12029                  | $dmxA^{\Delta TMD (\Delta 3-222)}$                                                                                                                                                                                                                                                                                 | This study |
| SA12095                  | $dmxA^{\Delta TMD (\Delta 3-222)} attB::pMH123$ ( $P_{pilA} cdGreen2 mScarlet-I$ )                                                                                                                                                                                                                                 | This study |
| SA7192                   | $pilQ-sfGFP$                                                                                                                                                                                                                                                                                                       | 33         |
| SA12017                  | $pilQ-sfGFP \Delta gltB$                                                                                                                                                                                                                                                                                           | 25         |
| SA8505                   | $\Delta dmxA pilQ-sfGFP$                                                                                                                                                                                                                                                                                           | This study |
| SA12019                  | $\Delta dmxA pilQ-sfGFP \Delta gltB$                                                                                                                                                                                                                                                                               | This study |
| SA7896                   | $mCherry-pilM$                                                                                                                                                                                                                                                                                                     | 22         |
| SA8576                   | $\Delta dmxA mCherry-pilM$                                                                                                                                                                                                                                                                                         | This study |

|                       |                                                                                                                                                                      |               |
|-----------------------|----------------------------------------------------------------------------------------------------------------------------------------------------------------------|---------------|
| SA9307                | <i>mCherry-pilT</i>                                                                                                                                                  | 34            |
| SA8575                | $\Delta$ <i>dmxA mCherry-pilT</i>                                                                                                                                    | This study    |
| SA9300                | <i>pilB-mCherry</i>                                                                                                                                                  | 34            |
| SA8572                | $\Delta$ <i>dmxA pilB-mCherry</i>                                                                                                                                    | This study    |
| SA7507                | <i>romR-mCherry</i>                                                                                                                                                  | 6             |
| SA12056               | <i>romR-mCherry <math>\Delta</math>gltB</i>                                                                                                                          | This study    |
| SA7459                | $\Delta$ <i>dmxA romR-mCherry</i>                                                                                                                                    | This study    |
| SA12064               | $\Delta$ <i>dmxA romR-mCherry <math>\Delta</math>gltB</i>                                                                                                            | This study    |
| SA10043               | <i>mglB-mVenus</i>                                                                                                                                                   | 7             |
| SA12024               | $\Delta$ <i>dmxA mglB-mVenus</i>                                                                                                                                     | This study    |
| SA8185                | <i>mglA-mVenus</i>                                                                                                                                                   | 6             |
| SA7480                | $\Delta$ <i>dmxA mglA-mVenus</i>                                                                                                                                     | This study    |
| SA7195                | <i>sgmX-mVenus</i>                                                                                                                                                   | 33            |
| SA12014               | $\Delta$ <i>dmxA sgmX-mVenus</i>                                                                                                                                     | This study    |
| <b><i>E. coli</i></b> |                                                                                                                                                                      |               |
| Mach1                 | $\Delta$ <i>recA1398 endA1 tonA <math>\Phi</math>80<math>\Delta</math>lacM15 <math>\Delta</math>lacX74 hsdR(r<sub>K</sub><sup>-</sup> m<sub>K</sub><sup>+</sup>)</i> | Invitrogen    |
| Rosetta 2 (DE3)       | F <sup>-</sup> <i>ompT hsdS<sub>B</sub>(r<sub>B</sub><sup>-</sup> m<sub>B</sub><sup>-</sup>) gal dcm</i> (DE3) pRARE2                                                | Novagen/Merck |

\*  $\Delta$ 10 mutations are described in detail in strain SA5666.

**Table S4.** Plasmids used in this work.

| Plasmid  | Description                                                                                                            | Reference |
|----------|------------------------------------------------------------------------------------------------------------------------|-----------|
| pBJ114   | <i>galK</i> , Km <sup>r</sup>                                                                                          | 35        |
| pSW105   | <i>attP</i> , P <sub><i>pilA</i></sub> Km <sup>r</sup>                                                                 | 36        |
| pSWU30   | <i>attP</i> , Tet <sup>r</sup>                                                                                         | 37        |
| pMR3691  | <i>MXAN_18-19</i> , <i>vanR</i> P <sub><i>van</i></sub> , Tet <sup>r</sup>                                             | 38        |
| pMAL-c6t | Expression vector, P <sub>tac</sub> , His <sub>6</sub> -MalE, Amp <sup>r</sup>                                         | NEB       |
| pET28(+) | Expression vector, P <sub>T7</sub> His <sub>6</sub> , Km <sup>r</sup>                                                  | Novagen   |
| pMAT162  | pBJ114, in-frame deletion construct for <i>pilA</i> , Km <sup>r</sup>                                                  | 6         |
| pDK25    | pBJ114, in-frame deletion construct for <i>gltB</i> , Km <sup>r</sup>                                                  | 11        |
| pAP19    | pBJ114, in-frame deletion construct for <i>frzE</i> , Km <sup>r</sup>                                                  | 33        |
| pMP072   | pBJ114, in-frame deletion construct for <i>dmxA</i> , Km <sup>r</sup>                                                  | This work |
| pTP140   | pSWU30, P <sub>nat</sub> <i>dmxA</i> , Tet <sup>r</sup>                                                                | 39        |
| pMP092   | pSWU30, P <sub>nat</sub> <i>dmxA-mVenus</i> , Tet <sup>r</sup>                                                         | This work |
| pMP093   | pBJ114, <i>dmxA</i> replacement by <i>dmxA-mVenus</i> , Km <sup>r</sup>                                                | This work |
| pMP164   | pBJ114, for native site integration of <i>dmxA-mVenus</i> , Km <sup>r</sup>                                            | This work |
| pMP165   | pBJ114, for native site integration of <i>dmxA</i> <sup>E626A</sup> - <i>mVenus</i> , Km <sup>r</sup>                  | This work |
| pMP095   | pBJ114, <i>dmxA</i> replacement by <i>dmxA</i> <sup>R615A</sup> - <i>mVenus</i> , Km <sup>r</sup>                      | This work |
| pKH02    | pBJ114, in-frame deletion of <i>mVenus</i> in the <i>dmxA</i> <sup>R615A</sup> - <i>mVenus</i> strain, Km <sup>r</sup> | This work |
| pMP175   | pBJ114, <i>dmxA</i> or <i>dmxA-mVenus</i> replacement by <i>dmxA</i> <sup>ΔGAF×2 (Δ223-532)</sup> , Km <sup>r</sup>    | This work |
| pMP179   | pBJ114, <i>dmxA</i> or <i>dmxA-mVenus</i> replacement by <i>dmxA</i> <sup>ΔTMD (Δ3-222)</sup> , Km <sup>r</sup>        | This work |
| pMP182   | pBJ114, for native site integration of <i>dmxA</i> <sup>TMD (1-167)</sup> - <i>mVenus</i> , Km <sup>r</sup>            | This work |
| pMH113   | pMAL-c6t, <i>malE-dmxA</i> <sup>WT(223-722)</sup> , Amp <sup>r</sup>                                                   | This work |
| pTP139   | pET28a, His <sub>6</sub> - <i>dmxA</i> <sup>223-722, E626A</sup> , Km <sup>r</sup>                                     | This work |
| pMH117   | pMAL-c6t, <i>malE-dmxA</i> <sup>E626A (223-722, E626A)</sup> , Amp <sup>r</sup>                                        | This work |
| pMP082   | pET28a, His <sub>6</sub> - <i>dmxA</i> <sup>223-722, R615A</sup> , Km <sup>r</sup>                                     | This work |
| pMH116   | pMAL-c6t, <i>malE-dmxA</i> <sup>R615A (223-722, R615A)</sup> , Amp <sup>r</sup>                                        | This work |
| pMH114   | pMAL-c6t, <i>malE-dmxA</i> <sup>GAF×2 (223-547)</sup> , Amp <sup>r</sup>                                               | This work |
| pMH115   | pMAL-c6t, <i>malE-dmxA</i> <sup>GGDEF (546-722)</sup> , Amp <sup>r</sup>                                               | This work |
| pMAT74   | pBJ114, in-frame deletion construct for <i>ftsZ</i> , Km <sup>r</sup>                                                  | This work |
| pMAT86   | pMR3691, <i>ftsZ</i> , Tet <sup>r</sup>                                                                                | This work |
| pMH52    | pEX-k168, <i>miniTurbo-FLAG</i> , Km <sup>r</sup>                                                                      | This work |
| pMP172   | pSW105, <i>dmxA-miniTurbo-FLAG</i> , Km <sup>r</sup>                                                                   | This work |
| pMH98    | pBJ114, <i>ftsK</i> replacement by <i>ftsK-miniTurbo-FLAG</i> , Km <sup>r</sup>                                        | This work |
| pMH110   | pSW105, <i>ftsK-miniTurbo-FLAG</i> , Km <sup>r</sup>                                                                   | This work |

|                              |                                                                                   |           |
|------------------------------|-----------------------------------------------------------------------------------|-----------|
| pBBR15.2-2H12.D11opt-scarRef | pBBR15.2, P <sub>tet-const</sub> <i>cdGreen2 mScarlet-I</i> , Km <sup>r</sup>     | 40        |
| pMH123                       | pSW105, <i>cdGreen2 mScarlet-I</i> , Km <sup>r</sup>                              | This work |
| pAP37                        | pBJ114, <i>pilQ</i> replacement by <i>pilQ-sfGFP</i> , Km <sup>r</sup>            | 33        |
| pMAT336                      | pBJ114, <i>pilM</i> replacement by <i>mCherry-pilM</i> , Km <sup>r</sup>          | 22        |
| pMEM33                       | pBJ114, <i>pilT</i> replacement by <i>mCherry-pilT</i> , Km <sup>r</sup>          | 34        |
| pMEM23                       | pBJ114, <i>pilB</i> replacement by <i>pilB-mCherry</i> , Km <sup>r</sup>          | 34        |
| pLC32                        | pBJ114, <i>romR</i> replacement by <i>romR-mCherry</i> , Km <sup>r</sup>          | 6         |
| pLC58                        | pBJ114, <i>mgIB</i> replacement by <i>mgIB-mVenus</i> , Km <sup>r</sup>           | 7         |
| pLC20                        | pBJ114, <i>mgIA</i> replacement by <i>mgIA-mVenus</i> , Km <sup>r</sup>           | 6         |
| pAP35                        | pBJ114, <i>sgmX</i> replacement by <i>sgmX-mVenus</i> , Km <sup>r</sup>           | 33        |
| pDJS01                       | pBJ114, in-frame deletion construct for <i>dmxB (MXAN_3735)</i> , Km <sup>r</sup> | 39        |
| pDJS02                       | pBJ114, in-frame deletion construct for <i>MXAN_5366</i> , Km <sup>r</sup>        | 39        |
| pDJS03                       | pBJ114, in-frame deletion construct for <i>MXAN_7362</i> , Km <sup>r</sup>        | 39        |
| pIH01                        | pBJ114, in-frame deletion construct for <i>gacA (MXAN_4463)</i> , Km <sup>r</sup> | 39        |
| pIH03                        | pBJ114, in-frame deletion construct for <i>MXAN_5791</i> , Km <sup>r</sup>        | 39        |
| pNGS010                      | pBJ114, in-frame deletion construct for <i>MXAN_2997</i> , Km <sup>r</sup>        | 39        |
| pTP120                       | pBJ114, in-frame deletion construct for <i>MXAN_1525</i> , Km <sup>r</sup>        | 39        |
| pTP121                       | pBJ114, in-frame deletion construct for <i>MXAN_5199</i> , Km <sup>r</sup>        | 39        |
| pTP125                       | pBJ114, in-frame deletion construct for <i>gacB (MXAN_2643)</i> , Km <sup>r</sup> | 39        |
| pTP127                       | pBJ114, in-frame deletion construct for <i>MXAN_4029</i> , Km <sup>r</sup>        | 39        |

**Table S5.** Oligonucleotides used in this work<sup>1</sup>

| Primer name              | Sequence 5'-3'                          |                                                                                              | Brief description                |
|--------------------------|-----------------------------------------|----------------------------------------------------------------------------------------------|----------------------------------|
| 3702_map_fwd2            | TGACCACCTGGTCTGTACGC                    | Operon mapping<br>Fragment A                                                                 | Primers used for operon mapping. |
| 3703_map_rev2            | GGGGGCCATAGTCCTTCTGG                    |                                                                                              |                                  |
| 3704_map_rev2            | TCATTGCGCAGGGCCTCATT                    | Operon mapping<br>Fragment B                                                                 |                                  |
| 3703_map_fwd2            | CGCGAACCAGGCGATGATTG                    |                                                                                              |                                  |
| 3704_map_fwd2            | AGGCCCTGCGCAATGAGATT                    | Operon mapping<br>Fragment C                                                                 |                                  |
| 3705_map_rev2            | AATGGCCACCACGACGAAGG                    |                                                                                              |                                  |
| 3705_map_fwd2            | GCCGCTGAGGATCACCATGT                    | Operon mapping<br>Fragment D                                                                 |                                  |
| 3706_map_rev2            | CTCTGGGGCATCGGCCTG                      |                                                                                              |                                  |
| ftsZ-up EcoRI            | GCGCGAATTCGGTGGACACGGATGGCGACG          | For deletion of <i>ftsZ</i>                                                                  |                                  |
| ftsZ-overlapping reverse | CGTCTGGCCCTTGTCTGATCGAACTGGTC           |                                                                                              |                                  |
| ftsZ-overlapping forward | CAGAACAAGGGCCAGACGGAAGTCCCGTAA          |                                                                                              |                                  |
| ftsZ-down HindIII        | GCGCAAGCTTTTGCAGCTGCCAGCCGATG           |                                                                                              |                                  |
| ftsZ-start NdeI          | GGAATTCATATGGACCAGTTCGATCAGAAC          | For expression of <i>ftsZ</i> under the P <sub>van</sub> promoter                            |                                  |
| ftsZ-stop KpnI           | GCGCGGTACCTTACGGCAGTTCGGTCTGGC          |                                                                                              |                                  |
| sfGFP_fwd_NdeI           | GCGCCATATGAGCAAAGGAGAAGAACT             | For expression of <i>sfGFP-miniTurbo-FLAG</i> under the P <sub>van</sub> promoter            |                                  |
| sfGFP_rev_OV             | CGCCCCCGCCTTTGTAGAGCTCATCCATGC          |                                                                                              |                                  |
| TurboID_fwd_OV           | GCTCTACAAAGGCGGGGGCGGGAGCATGAT          |                                                                                              |                                  |
| TurboID_rev_EcoRI        | GCGCGAATTCCTCACTTGTCTGTCGTCGTC          |                                                                                              |                                  |
| FtsK_A_BamHI             | GCGCGGATCCACGAGGACGACATGCTCGACGC        | For replacement of <i>ftsK</i> with <i>ftsK-miniTurbo-FLAG</i>                               |                                  |
| FtsK_B_TID_OV            | CGCCCCCGCCATGGCCCCGGCGCCGGGCA           |                                                                                              |                                  |
| TID_fwd_FtsK_OV          | CGGGGCCATGGGCGGGGGCGGGAGCATGAT          |                                                                                              |                                  |
| TID_rev_FtsK_OV          | CACGTGGCCCTCACTTGTCTGTCGTCGTCCT         |                                                                                              |                                  |
| FtsK_C_TID_OV            | CGACAAGTGAGGCCACGTTGCCGCCGTCT           |                                                                                              |                                  |
| FtsK_D_HindIII           | GCGCAAGCTTACCTTGAGGGCCACGAAGCCGG        | For expression of <i>ftsK-miniTurbo-FLAG</i> from the <i>attB</i> site and P <sub>pilA</sub> |                                  |
| FtsK_fwd_XbaI_2          | GCGCTCTAGACAGCCGAAATGTAGGTTCCCCGTCTGAGC |                                                                                              |                                  |
| FtsK_B_TID_OV 2          | CGCCCCCGCCATGGCCCCGGCGCCGGGCATGTCG      |                                                                                              |                                  |
| TID_fwd_FtsK_OV          | CGGGGCCATGGGCGGGGGCGGGAGCATGAT          |                                                                                              |                                  |
| Flag_rev HindIII         | GCGCAAGCTTTCACTTGTCTGTCGTCGTC           |                                                                                              |                                  |
| MalE-fwd_NotI            | GCGCGCGGCCGCGAGATCGAAGGCGCCGTGC         | For expression and purification of MalE-tagged DmxA variants                                 |                                  |
| DmxA_Rev_HindIII         | GCGCAAGCTTTTCAAGACGCGTTCCGCCGCT         |                                                                                              |                                  |
| DmxA_GAF2_rev_HindIII    | CTGAGGATCCTCACGTGGTGGCCATGCGCTCCA       |                                                                                              |                                  |
| DmxA_GGDEFonly_Fwd_NotI  | CTGAGGATCCTCACGTGGTGGCCATGCGCTCCA       |                                                                                              |                                  |
| 3705 GAF1 forw NdeI      | ATCGCATATGGAGATCGAAGGCGCCGTGC           | For expression and purification of His6-tagged DmxA protein variants                         |                                  |
| 3705 E626A (-)           | GACGAACTCCGCGCCGCCGTA                   |                                                                                              |                                  |
| 3705 E626A (+)           | TACGGCGGCGCGGAGTTCGTC                   |                                                                                              |                                  |
| 3705 R615A (-)           | GTCCGTATCGGCCGCCATCGTC                  |                                                                                              |                                  |
| 3705 R615A (+)           | GACGATGGCGGCCGATACGGAC                  |                                                                                              |                                  |
| 3705 rev BamHI           | ATCGGGATCCTCAGGACGCGTTCCGCCG            |                                                                                              |                                  |
| cdG-Sensor_fwd_XbaI      | ATGCTCTAGAATGAATTCGGAACCGCCGCC          | For expression of cdGreen and                                                                |                                  |
| cdG-Sensor_rev_HindIII   | ATTCAGCTTTCACCTGTACAGTTCATCCATACCACCG   |                                                                                              |                                  |

|                        |                                          |                                                                                  |
|------------------------|------------------------------------------|----------------------------------------------------------------------------------|
|                        |                                          | mScarlet-I from the <i>attB</i> site and the P <sub><i>pilA</i></sub>            |
| 3705_A                 | ATCGGGTACCAAGGTGACGTGCGACAAGAT           | For deletion of <i>dmxA</i>                                                      |
| 3705_B                 | CTTCAGCTGAGACGGAAACTCGGGAAG              |                                                                                  |
| 3705_C                 | TTTCCGTCTCAGCTGAAGGCGGCGAAC              |                                                                                  |
| 3705_D                 | ATCGTCTAGACATCACCGGGTGGACCGTCA           |                                                                                  |
| 3704 prmt forw +Xbal   | ATCGTCTAGATTTCCTCAACGCGCTGGCGCTG         | For P <sub>nat</sub> <i>dmxA</i> - <i>mVenus</i>                                 |
| 3705_rev no stop 1     | GCCGCCGCCGGACGCGTTCGCCGCCTTCAG           |                                                                                  |
| 3705_mVenus fw         | AACGCGTCCGGCGGCGGCGGCTCCATGGTGAGCAAGGG   |                                                                                  |
| mVenus_Kpn rev         | CGCGCCGGGTACCTTACTTGTACAGCTCGTCCA        | For replacement of <i>dmxA</i> with <i>dmxA</i> - <i>mVenus</i>                  |
| 3705_native forw       | ATATGGTACCTCCGCTACGGGGCGCCGCTG           |                                                                                  |
| 3705_native middle rev | CCCGGCTGCATCAAGGACTTACTTGTACAGCTCGTC     |                                                                                  |
| 3705_native middle fw  | GACGAGCTGTACAAGTAAGTCCTTGATGCAGCCGGG     |                                                                                  |
| 3705_native rev        | CGCGTCTAGACATCCCCGAGTCGGCCATCG           | For P <sub><i>pilA</i></sub> <i>dmxA</i> - <i>miniTurbo-FLAG</i>                 |
| 3705_PpilA forw        | CGCGTCTAGAATGACGTCGCTTCCCAGTT            |                                                                                  |
| 3705_miniTurboID fw    | AACGCGTCCGGCGGCGGCGGCTCCATGATCCCGCTCCTGA | For in-frame deletion of the GAF domains of <i>dmxA</i>                          |
| 3705_B (GAFx1)         | CGCGCGCAGCTTCACCGAGGCCACCAG              |                                                                                  |
| 3705_C (GAFx2)         | TCGGTGAAGCTGCGCGCGCAGCTCTAC              |                                                                                  |
| 3705_D (GAFx2)         | ATCGGGTACCGGACGCGTTCGCCGCCTTCA           |                                                                                  |
| 3705_B3 (TMD)          | TTCGATCTCCGTCATGGGGACTCCAGG              | For native site integration of <i>dmxA</i> <sup>ΔTMD</sup> - <i>mVenus</i>       |
| 3705_C3 (TMD)          | CCCATGACGGAGATCGAAGGCGCCGTG              |                                                                                  |
| 3705_D (TMD)2          | ATCGTCTAGACAGCGGCGCCCGTAGCGGA            |                                                                                  |
| 3705_TMH rev           | GGAGCCGCCGCCGCCAGCACCAGGTGGTAGAGGC       | For native site integration of <i>dmxA</i> <sup>TMD</sup> (1-167)- <i>mVenus</i> |
| 3705_mVenus fw2        | CTGGTGCTGGGCGGCGGCGGCTCCATGGTGAGCAAGGG   |                                                                                  |
| 3705_del_mVenus_(-)    | AAGGACTCAGGACGCGTTCGCCGCCTTCAG           | For deletion of <i>mVenus</i>                                                    |
| 3075_del_mVenus_(+)    | AACGCGTCTGAGTCCTTGATGCAGCCGGG            |                                                                                  |

<sup>1</sup> Underlined sequences indicate restriction sites.

**Table S6.** Fully sequenced myxobacterial genomes used for the 16S rRNA tree

| <b>Species and strain name</b>                              |
|-------------------------------------------------------------|
| <i>Anaeromyxobacter dehalogenans</i> 2CP-C                  |
| <i>Anaeromyxobacter</i> sp. Fw109-5                         |
| <i>Anaeromyxobacter</i> sp. K                               |
| <i>Anaeromyxobacter oryzae</i> Red232                       |
| <i>Anaeromyxobacter paludicola</i> Red630                   |
| <i>Archangium gephyra</i> DSM 2261                          |
| <i>Archangium violaceum</i> SDU34                           |
| <i>Chondromyces crocatus</i> Cm c5                          |
| <i>Corallococcus macrosporus</i> DSM 14697                  |
| <i>Corallococcus coralloides</i> DSM 2259                   |
| <i>Cystobacter fuscus</i> DSM 52655                         |
| <i>Haliangium ochraceum</i> DSM 14365                       |
| <i>Labilithrix luteola</i> DSM 27648                        |
| <i>Melittangium boletus</i> DSM 14713                       |
| <i>Minicystis rosea</i> DSM 24000                           |
| <i>Myxococcus fulvus</i> 124B02                             |
| <i>Myxococcus hansupus</i> ( <i>Myxococcus</i> sp. mixupus) |
| <i>Myxococcus stipitatus</i> DSM 14675                      |
| <i>Myxococcus xanthus</i> DK1622                            |
| <i>Nannocystis</i> sp. fl3                                  |
| <i>Polyangium aurulentum</i> SDU3-1                         |
| <i>Sandaracinus amylolyticus</i> DSM 53668                  |
| <i>Sorangium cellulosum</i> So ce 56                        |
| <i>Stigmatella aurantiaca</i> DW4/3-1                       |
| <i>Vulgatibacter incomptus</i> DSM 27710                    |



## Supplementary References

1. Black, W.P., Xu, Q. & Yang, Z. Type IV pili function upstream of the Dif chemotaxis pathway in *Myxococcus xanthus* EPS regulation. *Mol Microbiol* **61**, 447-456 (2006).
2. Carreira, L.A.M., Szadkowski, D., Lometto, S., Hochberg, G.K.A. & Sogaard-Andersen, L. Molecular basis and design principles of switchable front-rear polarity and directional migration in *Myxococcus xanthus*. *Nat Commun* **14**, 4056 (2023).
3. Carreira, L.A.M., Tostevin, F., Gerland, U. & Sogaard-Andersen, L. Protein-protein interaction network controlling establishment and maintenance of switchable cell polarity. *PLOS Genet* **16**, e1008877 (2020).
4. Leonardy, S. *et al.* Regulation of dynamic polarity switching in bacteria by a Ras-like G-protein and its cognate GAP. *EMBO J* **29**, 2276-2289 (2010).
5. Zhang, Y., Franco, M., Ducret, A. & Mignot, T. A bacterial Ras-like small GTP-binding protein and its cognate GAP establish a dynamic spatial polarity axis to control directed motility. *PLoS Biol* **8**, e1000430 (2010).
6. Szadkowski, D. *et al.* Spatial control of the GTPase MglA by localized RomR-RomX GEF and MglB GAP activities enables *Myxococcus xanthus* motility. *Nat Microbiol* **4**, 1344-1355 (2019).
7. Szadkowski, D., Carreira, L.A.M. & Sogaard-Andersen, L. A bipartite, low-affinity roadblock domain-containing GAP complex regulates bacterial front-rear polarity. *PLOS Genet* **18**, e1010384 (2022).
8. Leonardy, S., Freymark, G., Hebener, S., Ellehauge, E. & Sogaard-Andersen, L. Coupling of protein localization and cell movements by a dynamically localized response regulator in *Myxococcus xanthus*. *EMBO J* **26**, 4433-4444 (2007).
9. Keilberg, D., Wuichet, K., Drescher, F. & Sogaard-Andersen, L. A response regulator interfaces between the Frz chemosensory system and the MglA/MglB GTPase/GAP module to regulate polarity in *Myxococcus xanthus*. *PLOS Genet* **8**, e1002951 (2012).
10. Zhang, Y., Guzzo, M., Ducret, A., Li, Y.Z. & Mignot, T. A dynamic response regulator protein modulates G-protein-dependent polarity in the bacterium *Myxococcus xanthus*. *PLOS Genet* **8**, e1002872 (2012).
11. Jakobczak, B., Keilberg, D., Wuichet, K. & Sogaard-Andersen, L. Contact- and protein transfer-dependent stimulation of assembly of the gliding motility machinery in *Myxococcus xanthus*. *PLOS Genet* **11**, e1005341 (2015).
12. Luciano, J. *et al.* Emergence and modular evolution of a novel motility machinery in bacteria. *PLOS Genet* **7**, e1002268 (2011).
13. Mignot, T., Shaevitz, J.W., Hartzell, P.L. & Zusman, D.R. Evidence that focal adhesion complexes power bacterial gliding motility. *Science* **315**, 853-856 (2007).
14. Nan, B. *et al.* Flagella stator homologs function as motors for myxobacterial gliding motility by moving in helical trajectories. *Proc Natl Acad Sci USA* **110**, E1508-1513 (2013).

15. Nan, B., Mauriello, E.M., Sun, I.H., Wong, A. & Zusman, D.R. A multi-protein complex from *Myxococcus xanthus* required for bacterial gliding motility. *Mol Microbiol* **76**, 1539-1554 (2010).
16. Wartel, M. *et al.* A versatile class of cell surface directional motors gives rise to gliding motility and sporulation in *Myxococcus xanthus*. *PLOS Biol* **11**, e1001728 (2013).
17. Treuner-Lange, A. *et al.* The small G-protein MglA connects to the MreB actin cytoskeleton at bacterial focal adhesions. *J Cell Biol* **210**, 243-256 (2015).
18. Islam, S.T. *et al.* Unmasking of the von Willebrand A-domain surface adhesin CglB at bacterial focal adhesions mediates myxobacterial gliding motility. *Sci Adv* **9**, eabq0619 (2023).
19. Nan, B. *et al.* Myxobacteria gliding motility requires cytoskeleton rotation powered by proton motive force. *Proc Natl Acad Sci USA* **108**, 2498-2503 (2011).
20. Sun, M., Wartel, M., Cascales, E., Shaevitz, J.W. & Mignot, T. Motor-driven intracellular transport powers bacterial gliding motility. *Proc Natl Acad Sci USA* **108**, 7559-7564 (2011).
21. Chang, Y.W. *et al.* Architecture of the type IVa pilus machine. *Science* **351**, aad2001 (2016).
22. Treuner-Lange, A. *et al.* PilY1 and minor pilins form a complex priming the type IVa pilus in *Myxococcus xanthus*. *Nat Commun* **11**, 5054 (2020).
23. Nudleman, E., Wall, D. & Kaiser, D. Polar assembly of the type IV pilus secretin in *Myxococcus xanthus*. *Mol Microbiol* **60**, 16-29 (2006).
24. Friedrich, C., Bulyha, I. & Søgaard-Andersen, L. Outside-in assembly pathway of the type IV pilus system in *Myxococcus xanthus*. *J Bacteriol* **196**, 378-390 (2014).
25. Herfurth, M., Pérez-Burgos, M. & Søgaard-Andersen, L. The mechanism for polar localization of the type IVa pilus machine in *Myxococcus xanthus*. *mBio*, in press (2023).
26. Bischof, L.F., Friedrich, C., Harms, A., Søgaard-Andersen, L. & van der Does, C. The type IV pilus assembly ATPase PilB of *Myxococcus xanthus* interacts with the inner membrane platform protein PilC and the nucleotide-binding protein PilM. *J Biol Chem* **291**, 6946-6957 (2016).
27. Takhar, H.K., Kemp, K., Kim, M., Howell, P.L. & Burrows, L.L. The platform protein is essential for type IV pilus biogenesis. *J Biol Chem* **288**, 9721-9728 (2013).
28. Kuzmich, S. *et al.* CRP-like transcriptional regulator MrpC curbs c-di-GMP and 3',3'-cGAMP nucleotide levels during development in *Myxococcus xanthus*. *mBio* **13**, e0004422 (2021).
29. Smyth, G.K. Linear models and empirical Bayes methods for assessing differential expression in microarray experiments. *Stat Appl Genet Mol Biol* **3**, Article3 (2004).
30. Kaiser, D. Social gliding is correlated with the presence of pili in *Myxococcus xanthus*. *Proc Natl Acad Sci USA* **76**, 5952-5956 (1979).

31. Wu, S.S., Wu, J. & Kaiser, D. The *Myxococcus xanthus pilT* locus is required for social gliding motility although pili are still produced. *Mol Microbiol* **23**, 109-121 (1997).
32. Herfurth, M., Müller, F., Søgaaard-Andersen, L. & Glatter, T. A miniTurbo-based proximity labeling protocol to identify conditional protein interactomes *in vivo* in *Myxococcus xanthus*. *STAR Protoc* **4**, 102657 (2023).
33. Potapova, A., Carreira, L.A.M. & Søgaaard-Andersen, L. The small GTPase MglA together with the TPR domain protein SgmX stimulates type IV pili formation in *M. xanthus*. *Proc Natl Acad Sci USA* **117**, 23859-23868 (2020).
34. Oklitschek, M., Carreira, L.A.M., Muratoğlu, M., Søgaaard-Andersen, L. & Treuner-Lange, A. Combinatorial control of type IVa pili formation by the four polarized regulators MglA, SgmX, FrzS and SopA. *bioRxiv*, 2024.2003.2011.584430 (2024).
35. Julien, B., Kaiser, A.D. & Garza, A. Spatial control of cell differentiation in *Myxococcus xanthus*. *Proc Natl Acad Sci USA* **97**, 9098-9103 (2000).
36. Jakovljevic, V., Leonardy, S., Hoppert, M. & Søgaaard-Andersen, L. PilB and PilT are ATPases acting antagonistically in type IV pilus function in *Myxococcus xanthus*. *J Bacteriol* **190**, 2411-2421 (2008).
37. Wu, S.S. & Kaiser, D. Regulation of expression of the *pilA* gene in *Myxococcus xanthus*. *J Bacteriol* **179**, 7748-7758 (1997).
38. Iniesta, A.A., Garcia-Heras, F., Abellon-Ruiz, J., Gallego-Garcia, A. & Elias-Arnanz, M. Two systems for conditional gene expression in *Myxococcus xanthus* inducible by isopropyl-beta-D-thiogalactopyranoside or vanillate. *J Bacteriol* **194**, 5875-5885 (2012).
39. Skotnicka, D. *et al.* C-di-GMP regulates type IV pili-dependent-motility in *Myxococcus xanthus*. *J Bacteriol* **198**, 77-90 (2015).
40. Kaczmarczyk, A. *et al.* A genetically encoded biosensor to monitor dynamic changes of c-di-GMP with high temporal resolution. *Nat Commun* **15**, 3920 (2024).
